# Supplementary material for: Synthesis, characterization and catalytic activity of lithium and sodium iminophenoxide complexes towards ring-opening polymerization of l-lactide
Source: Royal Society of Chemistry journal article supplement (doi:10.1039/c2dt12063a), 2012-01-01
Supplement: c2dt12063a.pdf [file c2dt12063a.pdf]

## Supporting Information

**Table S1.** Summary of X-ray Crystallography Data of **L<sup>5</sup>Li**

|                                |                                             |
|--------------------------------|---------------------------------------------|
| Emp. Formula                   | C <sub>14</sub> H <sub>12</sub> NOSLi       |
| Form. Weight                   | 249.25                                      |
| Crystal system                 | Cubic                                       |
| Space group                    | I-43d                                       |
| a (Å)                          | 25.6289(2)                                  |
| b (Å)                          | 25.6289(2)                                  |
| c (Å)                          | 25.6289(2)                                  |
| α(°)                           | 90°                                         |
| β(°)                           | 90°                                         |
| γ(°)                           | 90°                                         |
| Volume (Å <sup>3</sup> )       | 16834.1(2)                                  |
| Z                              | 48                                          |
| Density                        | 1.180 Mg/m <sup>3</sup>                     |
| F(000)                         | 6240                                        |
| Crystal size(mm <sup>3</sup> ) | 0.50 x 0.45 x 0.40                          |
| • • range                      | 2.97 to 25.98°                              |
| Index ranges                   | -17<=h<=31<br>-31<=k<=31<br>-29<=l<=17      |
| Ref. collected                 | 11277                                       |
| Ind. Reflections               | 2612 [R(int) = 0.0363]                      |
| Complete to θ                  | 99.8%                                       |
| Max. and min transmission      | 1.000000 and 0.78818                        |
| Data / Restraints/ parameters  | 2612 / 0 / 165                              |
| GOF                            | 1.175                                       |
| Final R indices                | R1=0.0819                                   |
| [I > 2 sigma (I)]              | wR2=0.2554                                  |
| R indices                      | R1 = 0.0936                                 |
| (all data)                     | wR2 = 0.2681                                |
| Largest diff. Peak and hole    | 0.661 and -0.687 e.Å <sup>-3</sup>          |
| Temperature                    | 110(2) K                                    |
| Wavelength                     | 0.71073 Å                                   |
| Abs. correction                | SADABS                                      |
| Refine. Method                 | Full-matrix least-squares on F <sup>2</sup> |

<sup>a</sup>R1=|(F<sub>o</sub>-|F<sub>c</sub>)/|F<sub>o</sub>||.

$${}^bR2 = \{[w(F_o^2 - F_c^2)^2] / [w](F_o^2)^2\}^{1/2}, w = 0.10.$$

$${}^cGoF = [w(F_o^2 - F_c^2)^2] / (N_{\text{reflms}} - N_{\text{params}})^{1/2}.$$

**Table S2** Selected bond lengths (Å) and angle (°) of **L<sup>5</sup>Li**

|               | bond lengths (Å) |
|---------------|------------------|
| Li-O(1)       | 1.932(10)        |
| Li-O(1B)      | 1.979(10)        |
| Li-O(1C)      | 1.995(10)        |
| Li-S(1)       | 2.825(10)        |
| Li-N(1)       | 2.160(10)        |
|               | bond angle (°)   |
| O(1B)-Li-N(1) | 154.0(5)         |
| O(1)-Li-O(1C) | 92.0(4)          |
| O(1)-Li-S(1)  | 143.6(5)         |
| O(1C)-Li-S(1) | 123.3(4)         |

**Table S3.** Summary of X-ray Crystallography Data of  $L^4Na$

|                                |                                              |
|--------------------------------|----------------------------------------------|
| Emp. Formula                   | $C_{128}H_{128}N_8O_{20}Na_8$                |
| Form. Weight                   | 2282.30                                      |
| Crystal system                 | Triclinic                                    |
| Space group                    | P-1                                          |
| a (Å)                          | 12.3496(2)                                   |
| b (Å)                          | 22.1400(5)                                   |
| c (Å)                          | 24.1563(5)                                   |
| $\alpha$ (°)                   | 94.865(2)°                                   |
| $\beta$ (°)                    | 98.374(2)°                                   |
| $\gamma$ (°)                   | 99.712(2)°                                   |
| Volume (Å <sup>3</sup> )       | 6400.1(2)                                    |
| Z                              | 2                                            |
| Density                        | 1.184 Mg/m <sup>3</sup>                      |
| F(000)                         | 2400                                         |
| Crystal size(mm <sup>3</sup> ) | 0.40 x 0.40 x 0.20                           |
| • • range                      | 2.82 to 26.00°                               |
| Index ranges                   | -15 ≤ h ≤ 15<br>-27 ≤ k ≤ 27<br>-29 ≤ l ≤ 29 |
| Ref. collected                 | 64094                                        |
| Ind. Reflections               | 25131 [R(int) = 0.0294]                      |
| Complete to $\theta$           | 99.9%                                        |
| Max. and min transmission      | 1.000000 and 0.96375                         |
| Data / Restraints/ parameters  | 25131 / 0 / 1481                             |
| GOF                            | 1.018                                        |
| Final R indices                | R1=0.0527                                    |
| [I > 2 sigma (I)]              | wR2=0.1781                                   |
| R indices                      | R1 = 0.0776                                  |
| (all data)                     | wR2 = 0.1878                                 |
| Largest diff. Peak and hole    | 0.482 and -0.520 e.Å <sup>-3</sup>           |
| Temperature                    | 110(2) K                                     |
| Wavelength                     | 0.71073 Å                                    |
| Abs. correction                | SADABS                                       |
| Refine. Method                 | Full-matrix least-squares on F <sup>2</sup>  |

$$^a R1 = \frac{|(F_o - F_c)|}{|F_o|}$$

$$^b R2 = \left\{ \frac{[w(F_o^2 - F_c^2)^2]}{[w](F_o^2)^2} \right\}^{1/2}, w = 0.10.$$

$$^c GoF = \left[ \frac{[w(F_o^2 - F_c^2)^2]}{(N_{\text{rflns}} - N_{\text{params}})} \right]^{1/2}.$$

**Table S4** Selected bond lengths (Å) and angle (°) of L<sup>4</sup>Na

|                 | bond lengths (Å) |
|-----------------|------------------|
| Na-O(1)         | 2.239(2)         |
| Na-N(1)         | 2.383(2)         |
| Na-O(2)         | 2.338(2)         |
| Na-O(3)         | 2.328(2)         |
| Na-O(7)         | 2.308(2)         |
| Na-N(2)         | 2.897(3)         |
|                 | bond angle (°)   |
| O(2)-Na(1)-O(1) | 150.05(9)        |
| O(1)-Na(2)-O(9) | 170.54(9)        |
| N(2)-Na(1)-N(1) | 84.71(8)         |
| O(3)-Na(1)-N(2) | 65.42(7)         |
| O(3)-Na(1)-O(7) | 86.45(7)         |
| O(7)-Na(1)-N(1) | 124.52(9)        |
| O(4)-Na(2)-N(2) | 65.29(8)         |
| N(2)-Na(2)-O(3) | 72.40(8)         |
| O(3)-Na(2)-O(5) | 85.03(7)         |
| O(5)-Na(2)-O(4) | 137.93(8)        |
